1

2

3 **A dynamic neural network model for predicting risk of Zika in real-time**

4

5

6 Mahmood Akhtar<sup>1\*</sup>, Moritz U.G. Kraemer<sup>2,3,4</sup>, Lauren M. Gardner<sup>5,1ψ</sup>

7

8 <sup>1</sup>School of Civil and Environment Engineering, University of New South Wales,  
9 Sydney, NSW 2052, Australia

10 <sup>2</sup> Department of Zoology, University of Oxford, Oxford OX1 3PS, UK

11 <sup>3</sup> Computational Epidemiology Group, Boston Children's Hospital, Boston, MA, USA

12 <sup>4</sup> Harvard Medical School, Boston, MA, USA

13 <sup>5</sup> Johns Hopkins University, Baltimore, MD, USA

14

15 Corresponding email: \*m.akhtar@unsw.edu.au (MA)

16 Corresponding email: ψl.gardner@jhu.edu (LG)

17

18 **Abstract**

19 **Background**

20 In 2015 the Zika virus spread from Brazil throughout the Americas, posing an  
21 unprecedented challenge to the public health community. During the epidemic,  
22 international public health officials lacked reliable predictions of the outbreak's  
23 expected geographic scale and prevalence of cases, and were therefore unable to plan  
24 and allocate surveillance resources in a timely and effective manner.

25

26 **Methods**

27 In this work we present a dynamic neural network model to predict the geographic  
28 spread of outbreaks in real-time. The modeling framework is flexible in three main  
29 dimensions i) selection of the chosen risk indicator, *i.e.*, case counts or incidence rate,  
30 ii) risk classification scheme, which defines the high risk group based on a relative or  
31 absolute threshold, and iii) prediction forecast window (one up to 12 weeks). The  
32 proposed model can be applied dynamically throughout the course of an outbreak to  
33 identify the regions expected to be at greatest risk in the future.

34

35 **Results**

36 The model is applied to the recent Zika epidemic in the Americas at a weekly  
37 temporal resolution and country spatial resolution, using epidemiological data,  
38 passenger air travel volumes, vector habitat suitability, socioeconomic and population  
39 data for all affected countries and territories in the Americas. The model performance  
40 is quantitatively evaluated based on the predictive accuracy of the model. We show  
41 that the model can accurately predict the geographic expansion of Zika in the

42 Americas with the overall average accuracy remaining above 85% even for prediction  
43 windows of up to 12 weeks.

44

#### 45 **Conclusions**

46 Sensitivity analysis illustrated the model performance to be robust across a range of  
47 features. Critically, the model performed consistently well at various stages  
48 throughout the course of the outbreak, indicating its potential value at any time during  
49 an epidemic. The predictive capability was superior for shorter forecast windows, and  
50 geographically isolated locations that are predominantly connected via air travel.

51 The highly flexible nature of the proposed modeling framework enables policy  
52 makers to develop and plan vector control programs and case surveillance strategies  
53 which can be tailored to a range of objectives and resource constraints.

54

#### 55 **Keywords**

56 Zika, epidemic risk prediction, dynamic neural network

57

58

59

60

## 61 **Background**

62 The Zika virus, which is primarily transmitted through the bite of infected *Aedes*  
63 *aegypti* mosquitoes (1), was first discovered in Uganda in 1947 (2) from where it  
64 spread to Asia in 1960s, where it since has caused small outbreaks. In 2007 ZIKV  
65 caused an island wide outbreak in Yap Island, Micronesia (3), followed by outbreaks  
66 in French Polynesia (4) and other Pacific islands between 2013–2014 where attack  
67 rates where up to 70% (5-7). It reached Latin America between late 2013 and early  
68 2014, but was not detected by public health authorities until May 2015 (8) and since  
69 affected 48 countries and territories in the Americas (9-11). Since there is no  
70 vaccination or treatment available for Zika infections (12, 13), the control of *Ae.*  
71 *aegypti* mosquito populations remains the most important intervention to contain the  
72 spread of the virus (14). In order to optimally allocate resources to suppress vector  
73 populations, it is critical to accurately anticipate the occurrence and arrival time of  
74 arboviral infections to detect local transmission (15).

75

76 Whereas for dengue, the most common arbovirus infection, prediction has attracted  
77 wide attention from researchers employing statistical modelling and machine learning  
78 methods to guide vector control (16-29), such real-time machine learning based  
79 models do not yet exist for Zika virus. Early warning systems for Thailand, Indonesia,  
80 Ecuador and Pakistan have been introduced and are currently in use (30-34). In  
81 addition to conventional predictions based on epidemiological and meteorological  
82 data (20, 35, 36), more recent models have successfully incorporated search engines  
83 (37, 38), land use (39), human mobility information (40, 41) and spatial dynamics  
84 (42-44), and various combinations of the above (45) to improve predictions. Whereas

85 local spread may be mediated by overland travel, continent wide spread is mostly  
86 driven by air passenger travel between climatically synchronous regions (46-52).  
87  
88 The aims of our work are to 1) present recurrent neural networks for time ahead  
89 predictive modelling as a highly flexible tool for outbreak prediction, and 2)  
90 implement and evaluate the model performance for the Zika epidemic in the  
91 Americas. The application of neural networks for epidemic risk forecasting has  
92 previously been applied to dengue forecasting and risk classification (53-58),  
93 detection of mosquito presence (59), temporal modeling of the oviposition of *Aedes*  
94 *aegypti* mosquito (60), *Aedes* larva identification (61), and epidemiologic time-series  
95 modeling through fusion of neural networks, fuzzy systems and genetic algorithms  
96 (62). Recently, Jian *et al* (63) performed a comparison of different machine learning  
97 models to map the probability of Zika epidemic outbreak using publically available  
98 global Zika case data and other known covariates of transmission risk. Their study  
99 provides valuable insight into the potential role of machine learning models for  
100 understanding Zika transmission; however, it is static in nature, *i.e.*, it does not  
101 account for time-series data, and did not account for human mobility, both of which  
102 are incorporated in our modelling framework.  
103  
104 Here, we apply a dynamic neural network model for N-week ahead prediction for the  
105 2015-2016 Zika epidemic in the Americas. The model implemented in this work  
106 relies on multi-dimensional time-series data at the country (or territory) level,  
107 specifically epidemiological data, passenger air travel volumes, vector habitat  
108 suitability for the primary spreading vector *Ae. aegypti*, socioeconomic and  
109 population data. The modeling framework is flexible in three main dimensions: 1) the

110 preferred risk indicator can be chosen by the policy maker, *e.g.*, we consider outbreak  
111 size and incidence rate as two primary indicators of risk for a region, 2) five risk  
112 classification schemes are defined, where each classification scheme varies in the  
113 (relative or absolute) threshold used to determine the set of countries deemed “high  
114 risk”, and 3) it can be applied for a range of forecast windows (1 – 12 weeks). Model  
115 performance and robustness is evaluated for various combinations of risk indicator,  
116 risk classification level, and forecasting windows. Thus, our work represents the first  
117 flexible framework of neural networks for epidemic risk forecasting, that allows  
118 policy makers to evaluate and weigh the trade-off in prediction accuracy between  
119 forecast window and risk classification schemes. Given the availability of the  
120 necessary data, the modelling framework proposed here can be applied in real time to  
121 future outbreaks of Zika, and other similar vector-borne outbreaks.

122

## 123 **Materials and Methods**

124

### 125 ***Data***

126 The model relies on socioeconomic, population, epidemiological, travel and mosquito  
127 vector suitability data. All data is aggregated to the country level and provided for all  
128 countries and territories in the Americas. Each data set and corresponding processing  
129 is described in detail below, and summarized in Table 1. All input data is available as  
130 Additional files 1-11.

131

132

133

134

**Table 1. Summary of input data**

| <b>Description</b>                                    | <b>Original Temporal Resolution</b> | <b>Spatial Resolution</b>  | <b>Temporal Disaggregation</b>             | <b>Reference</b>                                                                                                |
|-------------------------------------------------------|-------------------------------------|----------------------------|--------------------------------------------|-----------------------------------------------------------------------------------------------------------------|
| Zika cases (2015)                                     | monthly                             | country or territory level | estimation, smoothing spline curve fitting | (50, 51, 64)                                                                                                    |
| Zika cases (2016)                                     | weekly                              | country or territory level | -                                          | Pan American Health Organization (PAHO) (65)                                                                    |
| incidence rates                                       | weekly                              | country or territory level | (case counts/(population / 100,000))       | (51)                                                                                                            |
| incoming and outgoing travel volumes (2015)           | monthly                             | country or territory level | smoothing spline curve fitting             | International Air Transport Associate (IATA), (64)                                                              |
| incoming and outgoing travel volumes (2016)           | monthly                             | country or territory level | estimation, smoothing spline curve fitting | as previously done (51, 66, 67), (64)                                                                           |
| <i>Aedes</i> vector suitability                       | monthly                             | country or territory level | smoothing spline curve fitting             | (51, 64, 68, 69)                                                                                                |
| gross domestic product (GDP) per capita               | annual                              | country or territory level | -                                          | World Bank (70), and U.S. Bureau of Economic Analysis (71)                                                      |
| physicians per 1000 people                            | annual                              | country or territory level | -                                          | Centre of Disease Control and Prevention (CDC) (72), WHO World Health Statistics report (73), and the PAHO (74) |
| beds per 1000 people                                  | annual                              | country or territory level | -                                          |                                                                                                                 |
| population densities (people per sq. km of land area) | annual                              | country or territory level | -                                          | World Bank (75), and the U.S. Bureau of Economic Analysis (71)                                                  |

135

136 *Epidemiological Data*

137 Weekly Zika infected cases for each country and territory in the Americas were  
 138 extracted from the Pan American Health Organization (PAHO) (65), as described in  
 139 previous studies (48, 51) (data available: [github.com/andersen-lab/Zika-cases-](https://github.com/andersen-lab/Zika-cases-PAHO)  
 140 PAHO). The epidemiological weeks 1 - 78 are labeled herein as EPI weeks,

141 corresponding to the dates 29-Jun-2015 - 19-Dec-2016, respectively. Although Zika  
142 cases in Brazil were reported as early as May 2015, no case data is available for all of  
143 2015 from PAHO because the Brazil Ministry of Health did not declare the Zika cases  
144 and associated neurological and congenital syndrome as notifiable conditions until 17  
145 February of 2016 (65). The missing numbers of cases from July to December 2015 for  
146 Brazil were estimated based on the positive correlation between *Ae. aegypti*  
147 abundance (described below) and reported case counts as has been done previously  
148 (50, 51). We used smoothing spline (64) to estimate weekly case counts from the  
149 monthly reported counts. The weekly country level case counts (Figure 1A) were  
150 divided by the total population / 100,000, as previously described (51), to compute  
151 weekly *incidence rates* (Figure 1B).

152

### 153 *Travel Data*

154 Calibrated monthly passenger travel volumes for each airport-to-airport route in the  
155 world were provided by the International Air Transport Associate (IATA) (76), as  
156 previously used in (51, 66). The data includes origin, destination and stopover airport  
157 paths for 84% of global air traffic, and includes over 240 airlines and 3,400 airports.  
158 The airport level travel was aggregated to a regional level, to compute monthly  
159 movements between all countries and territories in the Americas. The *incoming* and  
160 *outgoing travel volumes* for each country and territory, originally available from  
161 IATA at a monthly temporal resolution, were curve fitted, again using smoothing  
162 spline method (64) to obtain corresponding weekly volumes to match with the  
163 temporal resolution of our model. In this study, data and estimates from 2015 were  
164 also used for 2016, as was done previously (51, 66, 67).

165



166 *Mosquito Suitability Data*

167 The monthly vector suitability data sets were based on habitat suitability for the  
168 principal Zika virus species *Ae. aegypti*, previously used in (51), and initially  
169 estimated using original high resolution maps (68) and then enriched to account for  
170 seasonal variation in the geographical distribution of *Ae. aegypti* by using time-  
171 varying covariate such as temperature persistence, relative humidity, and precipitation  
172 as well as static covariates such as urban versus rural areas. The monthly data was  
173 translated into weekly data using a smoothing spline (64).

174

175 *Socioeconomic and Human Population Data*

176 For a country, to prevent or manage an outbreak depends on their ability to implement  
177 a successful surveillance and vector control programs (77). Due to a lack of global  
178 data to quantify vector control at country level, we utilized alternative economic and  
179 health related country indicators which have previously been revealed to be critical  
180 risk factors for Zika spread (51). A country's economic development can be measured  
181 by the *gross domestic product (GDP)* per capita at purchasing power parity (PPP), in  
182 international dollars. The figures from World Bank (70) and the U.S. Bureau of  
183 Economic Analysis (71) were used to collect GDP data for each country. The number  
184 of *physicians* and the number of hospital *beds* per 10,000 people were used to indicate  
185 the availability of health infrastructure in each country. These figures for U.S. and  
186 other regions in the Americas were obtained from the Centre of Disease Control and  
187 Prevention (CDC) (72), WHO World Health Statistics report (73), and the PAHO  
188 (74). Finally, the human *population densities* (people per sq. km of land area) for each  
189 region were collected from World Bank (75) and the U.S. Bureau of Economic  
190 Analysis (71).

191 *Connectivity-risk Variables*

192 In addition to the raw input variables, novel connectivity-risk variables are defined and  
193 computed for inclusion in the model. These variables are intended to capture the risk  
194 posed by potentially infected travelers arriving at a given destination at a given point in  
195 time, and in doing so, explicitly capture the dynamic and heterogeneity of the air-traffic  
196 network in combination with real-time outbreak status. Two variables are chosen,  
197 hereafter referred to as *case-weighted travel risk* and *incidence-weighted travel risk*, as  
198 defined in equations (1.a) and (1.b), respectively.

199

200 
$$CR_j^t = \sum_i C_i^t \cdot V_{i,j}^t \quad \forall t, \forall j, i \neq j \quad (1.a)$$

201

202 
$$IR_j^t = \sum_i I_i^t \cdot V_{i,j}^t \quad \forall t, \forall j, i \neq j \quad (1.b)$$

203

204 For each region  $j$  at time  $t$ ,  $CR_j^t$  and  $IR_j^t$  are computed as the sum of product between  
205 passenger volume traveling from origin  $i$  into destination  $j$  at time  $t$  ( $V_{i,j}^t$ ) and the state  
206 of the outbreak at origin  $i$  at time  $t$ , namely reported cases,  $C_i^t$ , or reported incidence  
207 rate,  $I_i^t$ . Each of these two variables is computed for all 53 countries or territories for  
208 each of the 78 epidemiological weeks. The two dynamic variables,  $CR_j^t$  and  $IR_j^t$ , are  
209 illustrated in Figure 1C and 1D, below the raw case counts and incidence rates,  
210 respectively.

211

212 ***Neural Network Model***

213 A class of neural architectures based upon Nonlinear Auto Regressive models with  
214 eXogenous inputs (NARX) known as NARX neural networks (78-80) is employed  
215 herein due to its suitability for modeling of a range of nonlinear systems and

216 computational capabilities equivalent to Turing machines (81). The NARX networks,  
217 as compared to other recurrent neural network architectures, require limited feedback  
218 (i.e., feedback from the output neuron rather than from hidden states) and converge  
219 much faster with a better generalization (81, 82). The NARX model can be formalized  
220 as follows (81):

$$221 \quad y(t) = f\left(x(t), x(t-1), \dots, x(t-d_x); y(t-1), \dots, y(t-d_y)\right) \quad (2)$$

222 where  $x(t)$  and  $y(t)$  denote, respectively, the input and output (or target that should  
223 be predicted) of the model at discrete time  $t$ , while  $d_x$  and  $d_y$  (with  $d_x \geq 1$ ,  $d_y \geq 1$ ,  
224 and  $d_x \leq d_y$ ) are input and output delays called memory orders (Figure 2). In this  
225 work, a NARX model is implemented to provide  $N$ -step ahead prediction of a time  
226 series, as defined below:

227

$$228 \quad y_k(t+N) =$$
$$229 \quad f\left(\begin{array}{c} \mathbf{x}_1(t), \mathbf{x}_1(t-1), \dots, \mathbf{x}_1(t-d_x), \dots, \mathbf{x}_M(t), \mathbf{x}_M(t-1), \dots, \mathbf{x}_M(t-d_x), \\ y_k(t), y_k(t-1), \dots, y_k(t-d_y) \end{array}\right) \quad (3)$$

230

231 Here,  $y_k(t+N)$  is the risk classification predicted for the  $k^{\text{th}}$  region  $N$  weeks ahead  
232 (of present time  $t$ ), which is estimated as a function of  $\mathbf{x}_m(t)$  inputs from all  $m =$   
233  $1, 2, \dots, M$  regions for  $d_x$  previous weeks, and the previous risk classification state,  
234  $y_k(t)$  for region  $k$  for  $d_y$  previous weeks. The prediction model is applied at time  $t$ ,  
235 to predict for time  $t+N$ , and therefore relies on data available up until week  $t$ . That is,  
236 to predict outbreak risk for epidemiological week  $X$ ,  $N$ -weeks ahead, the model is  
237 trained and tested using data available up until week  $(X-N)$ . For example, 12-week  
238 ahead prediction for Epi week 40, is performed using data available up to week 28.

239 The function  $f(\cdot)$  is an unknown nonlinear mapping function that is approximated by

240 a Multilayer Perceptron (MLP) to form the NARX recurrent neural network (79, 80).  
241 In this work, series-parallel NARX neural network architecture is implemented in  
242 Matlab R2018a (The MathWorks, Inc., Natick, Massachusetts, United States) (83).  
243  
244 In the context of this work, the desired output,  $y_k(t + N)$ , is a binary risk classifier,  
245 *i.e.*, classifying a region  $k$  as high or low risk at time  $t+N$ , for each region,  $k$ ,  $N$   
246 weeks ahead (of  $t$ ). The vector of input variables for region  $m$  at time  $t$  is  $\mathbf{x}_m(t)$ , and  
247 includes both static and dynamic variables. We consider various relative (R) and  
248 absolute (A) thresholds to define the set of “high risk” countries at any point in time.  
249 We define relative risk thresholds that range uniformly between 10% and 50%, where  
250 the 10% scheme classifies the 10% of countries reporting the highest number of cases  
251 (or highest incidence rate) during a given week as high risk, and the other 90% as low  
252 risk, similar to (45). The relative risk schemes are referred herein as R=0.1, R=0.2,  
253 R=0.3, R=0.4, and R=0.5. It is worth noting, for a given percentile, *e.g.*, R=0.1, the  
254 relative risk thresholds are dynamic and vary week to week as a function of the scale  
255 of the epidemic, while the size of the high risk group remains fixed over time, *e.g.*,  
256 10% of all countries. We also consider absolute thresholds, which rely on case  
257 incidence rates to define the “high risk” group. Five absolute thresholds are selected  
258 based on the distribution of incidence values over all countries and the entire  
259 epidemic. Specifically, the 50th, 60th, 70th, 80th and 90th percentiles were chosen,  
260 and are referred herein as A=50, A=60, A=70, A=80, and A=90. These five thresholds  
261 correspond to weekly case incidence rates of 0.43, 1.47, 4.05, 9.5 and 32.35 (see  
262 Additional file 12: Figure S1), respectively. In contrast to the relative risk scheme,  
263 under the absolute risk scheme for a given percentile, *e.g.*, A=90, the threshold  
264 remains fixed but the size of the high (and low) risk group varies week to week based

265 on the scale of the epidemic. The fluctuation in group size for each threshold is  
266 illustrated in Additional file 12: Figure S1 for each classification scheme,  $A=50$  to  
267  $A=90$ . Critically, our prediction approach differs from (45), in that our model is  
268 trained to predict the risk level directly, rather than predict the number of cases, which  
269 are post-processed into risk categories. The performance of the model is evaluated by  
270 comparing the estimated risk level (high or low) to the actual risk level for all  
271 locations at a specified time. The actual risk level is simply defined at each time  
272 period  $t$  during the outbreak by ranking the regions based on to the number of  
273 reported case counts (or incidence rates), and grouping them into high and low risk  
274 groups according to the specified threshold and classification scheme.

275

276 The static variables used in the model include GDP PPP, population density, number  
277 of physicians, and number of hospital beds for each region. The dynamic variables  
278 include mosquito vector suitability, outbreak status (both reported case counts and  
279 reported incidence rates), total incoming travel volume, total outgoing travel volume,  
280 and the two connectivity-risk variables defined as in Equations (1.a) & (1.b), again for  
281 each region. Before applying to the NARX model, all data values are normalized to  
282 the range  $[0, 1]$ .

283

284 A major contribution of this work is the flexible nature of the model, which allows  
285 policy makers to be more or less risk averse in their planning and decision making.  
286 Firstly, the risk indicator can be chosen by the modeler; in this work we consider two  
287 regional risk indicators, i) the number of reported cases and ii) incidence rate. Second,  
288 we consider a range of risk classification schemes, which define the set of high-risk  
289 countries based on either a relative or absolute threshold that can be chosen at the

290 discretion of the modeler, *i.e.*,  $R=0.1, 0.2, 0.3, 0.4, 0.5$ , and  $A=90, 80, 70, 60, 50$ .

291 Third, the forecast window,  $N$ , is defined to range from  $N = 1, 2, 4, 8$  and 12 weeks.

292 Subsequently, any combination of risk indicator, risk classification scheme and

293 forecasting window can be modelled.

294

295 In initial settings of the series-parallel NARX neural network, a variety numbers of

296 hidden layer neurons and numbers of tapped delay lines (Eq. (2)) were explored for

297 training and testing of the model. Sensitivity analysis revealed minimal difference in

298 performance of the model under different settings. Therefore, for all experiments

299 presented in this work, the numbers of neural network hidden layer neurons and

300 tapped delay lines are kept constant as two and four, respectively.

301

302 To train and test the model, the actual risk classification for each region at each week

303 during the epidemic,  $y_k(t)$ , was used. For each model run, *e.g.*, a specified risk

304 indicator, risk classification scheme and forecasting window, the input and target

305 vectors are randomly divided into three sets:

306

307 1. 70% for training, to tune model parameters minimizing the mean square error

308 between the outputs and targets,

309 2. 15% for validation, to measure network generalization and to prevent

310 overfitting, by halting training when generalization stops improving (*i.e.*,

311 mean square error of validation samples starts increasing), and

312 3. 15% for testing, to provide an independent measure of network performance

313 during and after training.

314

315 The performance of the model is measured using two metrics: 1) prediction accuracy  
316 (ACC) and 2) receiver operating characteristic (ROC) curves. Prediction accuracy is  
317 defined as  $ACC = (TP + TN) / (TP + FP + TN + FN)$ , where true positive (TP) is the  
318 number of high risk locations correctly predicted as high risk, false negative (FN) is  
319 the number of high risk locations incorrectly predicted as low risk, true negative (TN)  
320 is the number of low risk locations correctly predicted as low risk, and false positive  
321 (FP) is the number of low risk locations incorrectly predicted as high risk. The second  
322 performance metric, ROC curve (84), explores the effects on TP and FP as the  
323 position of an arbitrary decision threshold is varied, which in the context of this  
324 prediction problem distinguished low and high risk locations. ROC curve can be  
325 characterized as a single number using the area under the ROC curve (AUC), with  
326 larger areas having an AUC that approaches one indicating a more accurate detection  
327 method. In addition to quantifying model performance using these two metrics, we  
328 evaluate the robustness of the predictions by comparing the ACC across multiple runs  
329 that vary in their selection of testing and training sets (resulting from the randomized  
330 sampling).

331

## 332 **Results**

333 The model outcome reveals the set of locations expected to be at high risk at a  
334 specified date in the future, *i.e.*,  $N$  weeks ahead of when the prediction is made. We  
335 apply the model for all epidemiological weeks throughout the epidemic, and evaluate  
336 performance under each combination of i) risk indicator, ii) classification scheme, and  
337 iii) forecast window. For each model run, both ACC and ROC AUC are computed.

338

339

### 340 ***Model Performance***

341 Figures 3 and 4 exemplify the output of the proposed model. Figure 3 illustrates the  
342 model predictions at a country-level for a 4-week prediction window, specifically for  
343 Epi week 40, *i.e.*, using data available up until week 36. Figure 3A illustrates the  
344 actual risk percentile each country is assigned to in week 40, based on reported case  
345 counts. The results presented in the remaining panels of Figure 3 reveal the risk level  
346 (high or low) predicted for each country under the five relative risk classification  
347 schemes, namely (B)  $R=0.1$ , (C)  $R=0.2$ , (D)  $R=0.3$ , (E)  $R=0.4$ , and (F)  $R=0.5$ , and  
348 whether or not it was correct. For Panels (B)-(E), green indicates a correctly predicted  
349 low risk country (TN), light grey indicates an incorrectly predicted high risk country  
350 (FP), dark grey indicates an incorrectly predicted low risk country (FN), and the  
351 remaining color indicates a correctly predicted high risk country (TP). The inset  
352 highlights the results for the *Caribbean* islands. The figure also presents the average  
353 ACC over all regions and ACC for just the Caribbean region (grouped similar to (10))  
354 for each classification scheme.

355

356 Figure 4 illustrates the model predictions at a country-level for varying prediction  
357 windows, and a fixed classification scheme of  $R=0.2$ , again for Epi week 40. Figure  
358 4A illustrates the actual risk classification (high or low) each country is assigned to in  
359 Epi week 40, based on reported case counts. The results presented in the remaining  
360 panels of Figure 4 reveal the risk level (high or low) predicted for each country under  
361 the five forecasting windows, specifically (B)  $N=1$ , (C)  $N=2$ , (D)  $N=4$ , (E)  $N=8$ , and  
362 (F)  $N=12$ , and whether or not it was correct. For Panels (B)-(E), red indicates a  
363 correctly predicted high risk country (TP), green indicates a correctly predicted low  
364 risk country (TN), light grey indicates an incorrectly predicted high risk country (FP),



365 dark grey indicates an incorrectly predicted low risk country (FN). The inset  
366 highlights the results for the *Caribbean* islands. Similar to Figure 3, for each forecast  
367 window, the reported ACC is averaged both over all regions and for just the  
368 Caribbean.

369

370 The model's performance and sensitivity to the complete range of input parameters is  
371 summarized in Additional file 13: Table S2. ACC is presented for each combination  
372 of risk indicator (case count and incidence rate), classification scheme (i.e.,  $R = 0.1,$   
373  $0.2, 0.3, 0.4, 0.5$  and  $A = 90, 80, 70, 60, 50$ ) and forecast window (i.e.,  $N = 1, 2, 4, 8$   
374 and  $12$ ), for selected Epi weeks throughout the epidemic. ROC AUC (averaged over  
375 all locations and all EPI weeks) is computed for all combinations of risk indicator  
376 (case count and incidence rate), classification scheme (i.e.,  $R = 0.1, 0.2, 0.3, 0.4, 0.5$   
377 and  $A = 90, 80, 70, 60, 50$ ) and forecast window (i.e.,  $N = 1, 2, 4, 8$  and  $12$ ).

378

379 Figures 5 and 6 illustrate trends in the model performance as a function of  
380 classification scheme and forecast window, aggregated over space and time.

381 Specifically, Figure 5 reveals the model performance (ACC, averaged over all  
382 locations and all EPI weeks) for each combination of risk classification scheme (i.e.,  
383  $R = 0.1, 0.2, 0.3, 0.4$  and  $0.5$ ) and forecast window (i.e.,  $N = 1, 2, 4, 8$  and  $12$ ). The  
384 aggregated ROC curves (averaged over all locations and all epidemiological weeks)  
385 for  $R=0.4$  are presented in Figure 6, and reveal the (expected) increased accuracy of  
386 the model as the forecast window is reduced. The ROC AUC results are consistent  
387 with ACC results presented in Figure 5, highlighting the superior performance of the  
388 1 and 2 week ahead prediction capability of the model. The ROC AUC value remains  
389 above 0.91 for  $N=1, 2$  and above 0.83 for  $N=4$ , both indicating high predictive

390 accuracy of the model. The ROC curves for the other relative risk classification  
 391 schemes are presented in Additional file 14: Figure S2.

392

393 ***Global and Regional Analysis***

394 We further explore the model’s performance at a regional level by dividing the  
 395 countries and territories in the Americas into three groups, namely *Caribbean, South*  
 396 *America* and *Central America*, as in (10), and compare with the *Global* performance,  
 397 *i.e.*, all countries. For each group the average performance of the model in terms of  
 398 ACC was evaluated and presented for each combination of risk indicator (case count  
 399 and incidence rate), classification scheme (*i.e.*,  $R = 0.1, 0.2, 0.3, 0.4, 0.5$  and  $A = 90,$   
 400  $80, 70, 60, 50$ ) and forecast window (*i.e.*,  $N = 1, 2, 4, 8$  and  $12$ ), aggregated over then  
 401 entire epidemic period (Table 2).

402 **Table 2. Summary of Global and Regional Model Performance**

| Relative Risk Classification Scheme | Prediction Window Size ( $N$ in weeks) | Overall Prediction Accuracy (ACC) |       |                |       |                |       |                 |       |
|-------------------------------------|----------------------------------------|-----------------------------------|-------|----------------|-------|----------------|-------|-----------------|-------|
|                                     |                                        | Global                            |       | Caribbean      |       | South America  |       | Central America |       |
|                                     |                                        | Risk Indicator                    |       | Risk Indicator |       | Risk Indicator |       | Risk Indicator  |       |
|                                     |                                        | incidence                         | cases | incidence      | cases | incidence      | cases | incidence       | cases |
| R=0.1                               | 1                                      | 95.71                             | 96.95 | 94.63          | 98.84 | 93.65          | 92.28 | 97.95           | 94.18 |
|                                     | 2                                      | 94.29                             | 96.12 | 92.90          | 98.86 | 91.68          | 90.78 | 97.01           | 90.67 |
|                                     | 4                                      | 91.30                             | 93.13 | 89.38          | 97.30 | 87.11          | 84.80 | 95.34           | 84.14 |
|                                     | 8                                      | 86.34                             | 90.63 | 85.72          | 95.70 | 74.58          | 81.97 | 91.74           | 76.69 |
|                                     | 12                                     | 82.57                             | 87.05 | 81.75          | 93.59 | 68.63          | 75.94 | 87.99           | 68.14 |
| R=0.2                               | 1                                      | 93.07                             | 93.54 | 91.73          | 94.94 | 92.65          | 90.16 | 92.64           | 87.33 |
|                                     | 2                                      | 90.01                             | 92.27 | 88.30          | 93.93 | 89.37          | 88.60 | 89.26           | 84.68 |
|                                     | 4                                      | 84.68                             | 88.09 | 82.66          | 89.72 | 82.77          | 84.40 | 82.28           | 76.49 |
|                                     | 8                                      | 75.22                             | 81.87 | 71.58          | 83.96 | 69.34          | 76.27 | 73.73           | 65.25 |
| R=0.3                               | 12                                     | 68.96                             | 78.25 | 65.01          | 80.92 | 62.75          | 71.30 | 63.73           | 58.09 |
|                                     | 1                                      | 90.70                             | 93.41 | 88.30          | 94.05 | 91.41          | 91.41 | 90.58           | 87.84 |
|                                     | 2                                      | 86.74                             | 89.82 | 85.27          | 91.06 | 86.68          | 86.68 | 84.15           | 80.46 |
|                                     | 4                                      | 80.85                             | 84.31 | 77.10          | 85.36 | 82.63          | 79.38 | 78.73           | 72.76 |
| R=0.4                               | 8                                      | 70.10                             | 76.46 | 64.73          | 77.31 | 69.34          | 71.34 | 66.31           | 58.05 |
|                                     | 12                                     | 63.37                             | 71.66 | 56.86          | 70.66 | 62.39          | 64.88 | 57.35           | 56.86 |
|                                     | 1                                      | 90.46                             | 91.68 | 88.25          | 91.31 | 93.03          | 90.54 | 87.84           | 86.64 |
|                                     | 2                                      | 86.79                             | 88.52 | 84.62          | 88.24 | 89.76          | 86.30 | 83.10           | 81.51 |
| R=0.5                               | 4                                      | 79.36                             | 81.67 | 76.41          | 81.97 | 83.04          | 75.44 | 72.57           | 71.83 |
|                                     | 8                                      | 68.47                             | 72.85 | 61.67          | 71.12 | 73.19          | 71.19 | 62.29           | 54.66 |
|                                     | 12                                     | 59.82                             | 65.22 | 51.89          | 60.33 | 62.21          | 60.96 | 53.19           | 53.43 |
|                                     | 1                                      | 89.51                             | 91.16 | 89.67          | 90.25 | 87.42          | 88.42 | 85.10           | 90.41 |
| R=0.5                               | 2                                      | 86.21                             | 86.90 | 84.83          | 86.13 | 85.15          | 82.84 | 83.10           | 84.15 |
|                                     | 4                                      | 77.67                             | 78.46 | 76.29          | 77.55 | 75.44          | 75.71 | 70.71           | 67.72 |
|                                     | 8                                      | 66.42                             | 68.05 | 61.99          | 65.78 | 69.80          | 68.26 | 53.60           | 47.46 |
|                                     | 12                                     | 56.16                             | 58.31 | 48.04          | 51.81 | 62.21          | 54.90 | 43.38           | 46.81 |

403

404 ***Model Robustness***

405 Figure 7A and 7B show how the ACC varies over 10 independent runs of the model.  
406 This sensitivity analysis was conducted for all combinations risk indicator, relative  
407 risk classification schemes, and selected epidemiological weeks (i.e., week number /  
408 starting date: 30 / 18-Jan-2016, 40 / 28-Mar-2016, 50 / 6-Jun-2016, 60 / 15-Aug-2016,  
409 and 70 / 24-Oct-2016). This time period represents a highly complex period of the  
410 outbreak with country level rankings fluctuating substantially, as evidenced in Figure  
411 1. Due to computation time, the sensitivity analysis was evaluated for only the 4-  
412 week forecast window. The size of the error bars illustrates the robustness of the  
413 proposed modeling framework.

414

415 ***NARX Feature Selection***

416 While the NARX framework does not provide assigned weights for each input feature  
417 as output, sensitivity analysis can be conducted to help identify the key predictive  
418 features. We tested the performance of the NARX framework under three different  
419 combinations of input features, with the particular objective of quantifying the role of  
420 travel data in our outbreak prediction model. We considered i) a simple ‘baseline’  
421 model using only case count and incidence data, ii) an expanded baseline model that  
422 includes case and incidence data, and all non-travel related variables, and iii) the  
423 proposed model which includes all features listed in Table 1. The results comparing  
424 the performance of these three models with the detailed list of input features for each  
425 is provided in Additional file 15: Table S1. The results reveal the case-related data  
426 (regional case counts and incidence rates) to be the dominant explanatory variables  
427 for predicting outbreak risk in a region, as would be expected. The inclusion of non-  
428 travel related variables (regional suitability, regional GDP, regional physicians,

429 regional hospital beds, regional population density) is not shown to improve  
430 predictive capability over the baseline model, and in fact, sometime performs worse  
431 than the baseline model. In contrast, the inclusion of travel data (weekly case-  
432 weighted travel risk, weekly incidence-weighted travel risk, weekly incoming travel  
433 volume, weekly outgoing travel volume) is revealed to improve the predictive  
434 capability, especially for the shorter prediction windows, with a higher AUC ROC for  
435 a majority (20 of the 25) of the scenarios tested. These results support the inclusion  
436 of the dynamic travel-related variables, which substantially increase the complexity of  
437 the model (inputs), and thus, justifies the use of the NARX framework selected.

438

#### 439 **Discussion**

440 Overall, the proposed model is shown to be accurate and robust, especially for shorter  
441 prediction windows and higher risk thresholds. As would be expected, the  
442 performance of the proposed model decreases as the prediction window increases  
443 because of the inherent uncertainty in outbreak evolution over long periods of time.  
444 Specifically, the model is almost 80% accurate for 4-week ahead prediction for all  
445 classification schemes, and almost 90% accurate for all 2-week ahead prediction  
446 scenarios, *i.e.*, the correct risk category of 9 out of 10 locations can always be  
447 predicted, indicating strong performance. Although, when the objective is to identify  
448 the top 10% of at-risk regions, the average accuracy of the model remains above 87%  
449 for prediction up to 12-weeks in advance. Generally, the model performance is  
450 shown to decrease as the risk threshold is reduced, *e.g.*, the size of the high risk group  
451 is increased, representing a more risk averse policy. The decrease in performance is  
452 likely due to the increased size and fluctuation of the high risk country set over time  
453 for lower thresholds. For example, for the absolute risk threshold of  $A=50$ , the

454 number of countries classified as high risk fluctuates between 1 and 34 throughout the  
455 course of the epidemic, compared with  $A=90$ , where the set only ranges from 0 to 12  
456 (see Additional file 12: Figure S1). These results reveal the trade-off between desired  
457 forecast window and precision of the high risk group. The quantifiable trade-off  
458 between the two model inputs (classification scheme and forecast window) can be  
459 useful for policies which may vary in desired planning objectives.

460

461 The results in Figures 3 and 4, as well as Table 2 reveal a similar trend at the regional  
462 level as was seen at the global level, with a decrease in predictive accuracy as the  
463 forecast window increases in length, and the and high risk group increases in size.  
464 As shown in Figure 3, the ACC remains above 90% for  $R < 0.3$ , indicating superior  
465 model performance. For example, at Epi week 40,  $R = 0.3$  and  $N=4$  (using outbreak  
466 data and other model variables up to Epi week 36), there were 16 total regions  
467 classified as high risk, of which the model correctly identified 13. Furthermore, of the  
468 16 high risk regions, 8 were in the *Caribbean* (i.e., Aruba, Curacao, Dominican  
469 Republic, Guadeloupe, Haiti, Jamaica, Martinique, and Puerto Rico), of which the  
470 model correctly identified 7. Aruba in the only Caribbean, and Honduras and Panama  
471 were the only regions incorrectly predicted as low risk in this scenario; accurately  
472 classifying low risk regions is also important (and assuring the model is not too risk  
473 averse). For the same scenario, i.e., Epi week 40,  $R = 0.3$  and  $N=4$ , all 18 low risk  
474 *Caribbean* locations and 17 of the 19 low risk non-*Caribbean* locations were  
475 accurately classified by the model. Paraguay and Suriname were the only regions  
476 incorrectly predicted as high risk. These results are consistent with the high reported  
477 accuracy of the model, i.e., Overall ACC = 90.15%; *Caribbean* ACC = 96.15%.

478

479 Figure 4 reveals that the performance of model, expectedly, deteriorates as the  
480 forecast window increases; however, the average accuracy remains above 80% for  
481 prediction up to 8-weeks ahead, and well about 90% for up to 4-weeks ahead. The  
482 prediction accuracy for the Caribbean slightly lags the average performance in the  
483 Americas. Specifically, for  $R=0.2$ , 5 of the 11 *Caribbean* regions were designated as  
484 HIGH risk locations at Epi week 40, *i.e.*, Dominican Republic, Guadeloupe, Jamaica,  
485 Martinique, Puerto Rico. For a one-week prediction window,  $N=1$ , the model was  
486 able to correctly predict 3 of the high risk regions (*i.e.*, Jamaica, Martinique, Puerto  
487 Rico), for  $N=2$  it correctly identified two (*i.e.*, Martinique, Puerto Rico), and for  $N=4$ ,  
488 it again correctly identified three (*i.e.*, Guadeloupe, Martinique, Puerto Rico).  
489 However, the model did not correctly predict any high risk locations in the Caribbean  
490 at  $N=8$  and  $N=12$  window lengths. This error is due to the low and sporadic reporting  
491 of Zika cases in the region around week 30, and the high variability of the outbreak  
492 over the 8 and 12 week period. Similar prediction capability is illustrated for  $R=0.5$   
493 (not shown in the figure), in which case out of the 13 *Caribbean* HIGH risk locations,  
494 the model correctly identifies all locations at  $N=1, 2$  and 4, 10 of the 13 locations at  
495  $N=8$ , and only 1 of the 13 at  $N=12$ .

496

497 When comparing performance across regions (see Table 2) results reveal the  
498 predictive accuracy is best for the *Caribbean* region, while predictions for *Central*  
499 *America* were consistently the worst; the discrepancy in performance between these  
500 groups increases as the forecast window increases. The difference in performance  
501 across regions can be attributed to the high spatial heterogeneity of the outbreak  
502 patterns, the relative ability of air travel to accurately capture connectivity between  
503 locations, and errors in case reporting that may vary by region. For example, the

504 *Caribbean*, which consists of more than twice as many locations as any other group,  
505 first reported cases around week 25, and remained affected throughout the epidemic.  
506 In contrast, *Central America* experienced a slow start to the outbreak (at least  
507 according to case reports) with two exceptions, namely Honduras and El Salvador.  
508 The large number of affected region in the Caribbean, with more reported cases  
509 distributed over a longer time period contributed to the training of the model, thus  
510 improving the predictive capability for these regions. Additionally, the geographically  
511 isolated nature of Caribbean islands enables air travel to more accurately capture  
512 incoming travel risk, unlike countries in Central and South America, where  
513 individuals can also move about using alternative modes, which are not accounted for  
514 in this study. These factors combined explain the higher predictive accuracy of the  
515 model for the Caribbean region, and importantly, helps to identify the critical features  
516 and types of settings under which this model is expected to perform best.  
517  
518 Finally, the robustness of the model predictions is illustrated by the short error bars in  
519 Figure 7. The model is also demonstrated to perform consistently throughout the  
520 course of the epidemic, with the exception of week 30, at which time there was  
521 limited information available to train the model, *e.g.*, the outbreak was not yet  
522 reported in a majority of the affected countries. Comparing Figure 7A and 7B reveals  
523 relatively similar performance for both risk indicators, and Additional File 13: Table 2  
524 demonstrating the model's flexibility and adaptability with respect to both the risk  
525 scheme chosen, *i.e.*, relative or absolute, and the metric used to classify outbreak risk,  
526 *i.e.*, number of cases or incidence rate in a region.  
527  
528

529 ***Limitations***

530 There are several limitations of this work. The underlying data on case reporting vary  
531 by country and may not represent the true transmission patterns (85). However, the  
532 framework presented was flexible enough to account for these biases and we  
533 anticipate will only be improved as data become more robust. Additionally, 2015  
534 travel data was used in place of 2016 data, as has been done previously (51, 66, 67),  
535 which may not be fully representative of travel behaviour. Furthermore, air travel is  
536 the only mode of travel accounted for, thus, additional person movements between  
537 country pairs that share land borders are unaccounted for, and as a result, the model  
538 likely underestimates the risk posed to some regions. This limitation may partially  
539 explain the increased model performance for the geographically isolated Caribbean  
540 Islands, which represent a large proportion of ZIKV affected regions. This study does  
541 not account for species of mosquitos other than *Ae. Aegypti*, such as *Ae. Albopictus*,  
542 which can also spread ZIKV; however, *Ae. Aegypti* are known to be the primary  
543 spreading vector, and responsible for the majority of the ZIKV epidemic in the  
544 Americas (86). Additionally, alternative non-vector-borne mechanisms of  
545 transmission are ignored. Lastly, due to the lack of spatial resolution of case reports,  
546 we were limited to make country to country spread estimates. We do however  
547 appreciate that there is considerable spatial variation within countries (i.e., northern  
548 vs. southern Brazil) and that this may influence the weekly covariates used in this  
549 study. We again hypothesise that models will become better as the spatial resolution  
550 of available data increases.

551

552

553



554 **Conclusions**

555 We have introduced a flexible, predictive modelling framework to forecast outbreak  
556 risk in real-time that can be scaled and readily applied in future outbreaks. An  
557 application of the model was applied to the Zika epidemic in the Americas at a  
558 weekly temporal resolution, and country-level spatial resolution, using a combination  
559 of population, socioeconomic, epidemiological, travel patterns and vector suitability  
560 data. The model performance was evaluated for various risk classification schemes,  
561 forecast windows and risk indicators, and illustrated to be accurate and robust across a  
562 broad range of these features. First, the model is more accurate for shorter prediction  
563 windows and restrictive risk classification schemes. Secondly, regional analysis  
564 reveals superior predictive accuracy for the Caribbean, suggesting the model to be  
565 best suited to geographically isolated locations that are predominantly connected via  
566 air travel. Predicting the spread to areas that are relatively isolated has previously  
567 been shown to be difficult due to the stochastic nature of infectious disease spread  
568 (87). Thirdly, the model performed consistently well at various stages throughout the  
569 course of the outbreak, indicating its potential value at the early stages of an epidemic.  
570 The outcomes from the model can be used to better guide outbreak resource allocation  
571 decisions, and can be easily adapted to model other vector-borne epidemics.

572

573

574 **Additional files**

575 **Additional file 1: Data (cases).** Country or territory level weekly Zika cases.

576

577 **Additional file 2: Data (incidence).** Country or territory level weekly Zika incidence  
578 rates.

579

580 **Additional file 3: Data (incoming\_travel).** Country or territory level, weekly  
581 incoming travel volume.

582

583 **Additional file 4: Data (outgoing\_travel).** Country or territory level weekly  
584 outgoing travel volume.

585

586 **Additional file 5: Data (suitability).** Country or territory level weekly *Aedes* vector  
587 suitability.

588

589 **Additional file 6: Data (gdp).** Country or territory level GDP per capita.

590

591 **Additional file 7: Data (physicians).** Country or territory level physicians per 1000  
592 people.

593

594 **Additional file 8: Data (beds).** Country or territory level beds per 1000 people.

595

596 **Additional file 9: Data (pop\_density).** Country or territory level population densities  
597 (people per sq. km of land area).

598

599 **Additional file 10: Data (case\_weighted\_travel\_risk).** Country or territory level  
600 weekly case-weighted travel risk.

601

602 **Additional file 11: Data (incidence\_weighted\_travel\_risk).** Country or territory  
603 level weekly incidence-weighted travel risk.

604

605 **Additional file 12: Figure S1. Number of high risk countries each week under all**  
606 **absolute risk classification schemes.** The number of countries classified as high risk  
607 each week for each absolute case incidence threshold, ranging from A=50 to A=90. In  
608 parentheses is the weekly incidence rate defining the high risk threshold based on the  
609 percentile (A) specified.

610

611 **Additional file 13: Table S2. Summary of model performance.** ACC is presented  
612 for each combination of risk indicator (case count and incidence rate), classification  
613 scheme (i.e., R = 0.1, 0.2, 0.3, 0.4, 0.5 and A = 90, 80, 70, 60, 50) and forecast  
614 window (i.e., N = 1, 2, 4, 8 and 12), for selected Epi weeks throughout the epidemic.  
615 ROC AUC (averaged over all locations and all EPI weeks) is computed for all  
616 combinations of risk indicator (case count and incidence rate), classification scheme  
617 (i.e., R = 0.1, 0.2, 0.3, 0.4, 0.5 and A = 90, 80, 70, 60, 50) and forecast window (i.e.,  
618 N = 1, 2, 4, 8 and 12).

619

620

621 **Additional files 14: Figure S2. Aggregate model performance measured by ROC**  
622 **AUC.** The ROC AUC is averaged over all locations and all weeks, for each relative  
623 risk classification scheme, *i.e.*,  $R = 0.1, 0.2, 0.3, 0.4, 0.5$  and forecast window *i.e.*,  $N =$   
624  $1, 2, 4, 8$  and  $12$ . For the results shown the risk indicator is case counts.

625  
626 **Additional file 15: Table S1. Summary of model sensitivity to feature selection.**  
627 The ACC and ROC AUC performance of the model is computed and presented under  
628 different combinations of input data features. The proposed model is compared  
629 against two baseline models; one includes only case (and incidence) data, and the  
630 second includes case and all non-travel related data, while the final proposed model  
631 includes all features. The results presented are for the absolute risk classification  
632 scheme, where the risk indicator is incidence rate.

633

### 634 **Abbreviations**

635 **ACC:** Prediction accuracy

636 **AUC:** Area under the curve

637 **CDC:** Centre of disease control and prevention

638 **FN:** False negative

639 **FP:** False positive

640 **GDP:** Gross domestic product

641 **IATA:** International air transport associate

642 **MLP:** Multilayer perceptron

643 **NARX:** Nonlinear autoregressive models with exogenous inputs

644 **PAHO:** Pan American health organization

645 **PPP:** Purchasing power parity

646 **ROC:** Receiver operating characteristic

647 **TN:** True negative

648 **TP:** True positive

649 **ZIKV:** Zika virus

650

651 **Ethics approval and consent to participate.** Not applicable.

652 **Consent for publication.** Not applicable.

653

654 **Availability of data and material.** All data used in this study is provided as  
655 Additional files.

656

657 **Competing Interests.** We have no competing interests.

658

659 **Authors' Contributions.** LG and MA conceived the study, designed the experiments,  
660 analyzed the model results, and drafted the original manuscript. MA developed the  
661 model and performed the computational analysis. MUGK contributed vector  
662 distribution data. All authors contributed to data curation and editing of the  
663 manuscript. LG supervised the study.

664 **Acknowledgements.** We thank Raja Jurdak and Dean Paini for their inputs and  
665 discussion on the model.

666

667 **Funding.** We received no funding for this work.

668

669

670

671 **References**

672

- 673 1. Chouin-Carneiro T, Vega-Rua A, Vazeille M, Yebakima A, Girod R, Goindin  
674 D, et al. Differential Susceptibilities of *Aedes aegypti* and *Aedes albopictus* from the  
675 Americas to Zika Virus. *PLoS Negl Trop Dis.* 2016;10(3):1-11.
- 676 2. Dick GW. Zika virus. II. Pathogenicity and physical properties. *Trans R Soc*  
677 *Trop Med Hyg.* 1952;46(5):521-34.
- 678 3. Duffy MR, Chen TH, Hancock WT, Powers AM, Kool JL, Lanciotti RS, et al.  
679 Zika virus outbreak on Yap Island, Federated States of Micronesia. *N Engl J Med.*  
680 2009;360(24):2536-43.
- 681 4. Hancock WT, Marfel M, Bel M. Zika virus, French Polynesia, South Pacific,  
682 2013. *Emerg Infect Dis.* 2014;20(11):1960.
- 683 5. Dupont-Rouzeyrol M, O'Connor O, Calvez E, Daures M, John M, Grangeon  
684 JP, et al. Co-infection with Zika and dengue viruses in 2 patients, New Caledonia,  
685 2014. *Emerg Infect Dis.* 2015;21(2):381-2.
- 686 6. Musso D, Nilles EJ, Cao-Lormeau VM. Rapid spread of emerging Zika virus  
687 in the Pacific area. *Clin Microbiol Infect.* 2014;20(10):O595-6.
- 688 7. Tognarelli J, Ulloa S, Villagra E, Lagos J, Aguayo C, Fasce R, et al. A report  
689 on the outbreak of Zika virus on Easter Island, South Pacific, 2014. *Arch Virol.*  
690 2016;161(3):665-8.
- 691 8. Faria NR, Azevedo RdSdS, Kraemer MUG, Souza R, Cunha MS, Hill SC, et  
692 al. Zika virus in the Americas: Early epidemiological and genetic findings. *Science.*  
693 2016.
- 694 9. Campos GS, Bandeira AC, Sardi SI. Zika Virus Outbreak, Bahia, Brazil.  
695 *Emerg Infect Dis.* 2015;21(10):1885-6.
- 696 10. PAHO. Regional Zika Epidemiological Update (Americas). In: World Health  
697 Organization PAHO, editor. Washington DC2017.
- 698 11. Zanoluca C, Melo VC, Mosimann AL, Santos GI, Santos CN, Luz K. First  
699 report of autochthonous transmission of Zika virus in Brazil. *Mem Inst Oswaldo Cruz.*  
700 2015;110(4):569-72.
- 701 12. Scott TW, Morrison AC. Vector dynamics and transmission of dengue virus:  
702 implications for dengue surveillance and prevention strategies: vector dynamics and  
703 dengue prevention. *Current topics in microbiology and immunology.* 2010;338:115-  
704 28.
- 705 13. Achee NL, Gould F, Perkins TA, Reiner RC, Jr., Morrison AC, Ritchie SA, et  
706 al. A critical assessment of vector control for dengue prevention. *PLoS Negl Trop*  
707 *Dis.* 2015;9(5):e0003655.
- 708 14. Vector control with a focus on *Aedes aegypti* and *Aedes albopictus*  
709 mosquitoes: literature review and analysis of information. Stockholm: ECDC:  
710 European Centre for Disease Prevention and Control; 2017.
- 711 15. McGough SF, Brownstein JS, Hawkins JB, Santillana M. Forecasting Zika  
712 Incidence in the 2016 Latin America Outbreak Combining Traditional Disease  
713 Surveillance with Search, Social Media, and News Report Data. *PLoS Negl Trop Dis.*  
714 2017;11(1):e0005295.
- 715 16. Martínez-Bello DA, López-Quílez A, Torres-Prieto A. Bayesian dynamic  
716 modeling of time series of dengue disease case counts. *PLOS Neglected Tropical*  
717 *Diseases.* 2017;11(7):e0005696.
- 718 17. Guo P, Liu T, Zhang Q, Wang L, Xiao J, Zhang Q, et al. Developing a dengue  
719 forecast model using machine learning: A case study in China. *PLOS Neglected*  
720 *Tropical Diseases.* 2017;11(10):e0005973.

- 721 18. Johansson MA, Reich NG, Hota A, Brownstein JS, Santillana M. Evaluating  
722 the performance of infectious disease forecasts: A comparison of climate-driven and  
723 seasonal dengue forecasts for Mexico. *Sci Rep*. 2016;6:33707.
- 724 19. Earnest A, Tan SB, Wilder-Smith A, Machin D. Comparing Statistical Models  
725 to Predict Dengue Fever Notifications. *Computational and Mathematical Methods in*  
726 *Medicine*. 2012;2012:6.
- 727 20. Hii YL, Zhu H, Ng N, Ng LC, Rocklöv J. Forecast of Dengue Incidence Using  
728 Temperature and Rainfall. *PLOS Neglected Tropical Diseases*. 2012;6(11):e1908.
- 729 21. Shi Y, Liu X, Kok SY, Rajarethinam J, Liang S, Yap G, et al. Three-Month  
730 Real-Time Dengue Forecast Models: An Early Warning System for Outbreak Alerts  
731 and Policy Decision Support in Singapore. *Environ Health Perspect*.  
732 2016;124(9):1369-75.
- 733 22. Teng Y, Bi D, Xie G, Jin Y, Huang Y, Lin B, et al. Dynamic Forecasting of  
734 Zika Epidemics Using Google Trends. *PLOS ONE*. 2017;12(1):e0165085.
- 735 23. Althouse BM, Ng YY, Cummings DAT. Prediction of Dengue Incidence  
736 Using Search Query Surveillance. *PLOS Neglected Tropical Diseases*.  
737 2011;5(8):e1258.
- 738 24. Morsy S, Dang TN, Kamel MG, Zayan AH, Makram OM, Elhady M, et al.  
739 Prediction of Zika-confirmed cases in Brazil and Colombia using Google Trends.  
740 *Epidemiology and Infection*. 2018;146(13):1625-7.
- 741 25. Kraemer MUG, Faria NR, Reiner RC, Jr., Golding N, Nikolay B, Stasse S, et  
742 al. Spread of yellow fever virus outbreak in Angola and the Democratic Republic of  
743 the Congo 2015-16: a modelling study. *The Lancet Infectious diseases*.  
744 2017;17(3):330-8.
- 745 26. Zhang Q, Sun K, Chinazzi M, Pastore YPA, Dean NE, Rojas DP, et al. Spread  
746 of Zika virus in the Americas. *Proc Natl Acad Sci U S A*. 2017;114(22):E4334-E43.
- 747 27. Ahmadi S, Bempong N-E, De Santis O, Sheath D, Flahault A. The role of  
748 digital technologies in tackling the Zika outbreak: a scoping review. *Journal of Public*  
749 *Health and Emergency*. 2018;2(6).
- 750 28. Majumder MS, Santillana M, Mekaru SR, McGinnis DP, Khan K, Brownstein  
751 JS. Utilizing Nontraditional Data Sources for Near Real-Time Estimation of  
752 Transmission Dynamics During the 2015-2016 Colombian Zika Virus Disease  
753 Outbreak. *JMIR Public Health Surveill*. 2016;2(1):e30.
- 754 29. Beltr JD, #225, Boscor A, Santos WPd, Massoni T, Kostkova P. ZIKA: A  
755 New System to Empower Health Workers and Local Communities to Improve  
756 Surveillance Protocols by E-learning and to Forecast Zika Virus in Real Time in  
757 Brazil. *Proceedings of the 2018 International Conference on Digital Health; Lyon,*  
758 *France*. 3194683: ACM; 2018. p. 90-4.
- 759 30. Cortes F, Turchi Martelli CM, Arraes de Alencar Ximenes R, Montarroyos  
760 UR, Siqueira Junior JB, Goncalves Cruz O, et al. Time series analysis of dengue  
761 surveillance data in two Brazilian cities. *Acta Trop*. 2018;182:190-7.
- 762 31. Abdur Rehman N, Kalyanaraman S, Ahmad T, Pervaiz F, Saif U,  
763 Subramanian L. Fine-grained dengue forecasting using telephone triage services.  
764 *Science Advances*. 2016;2.
- 765 32. Lowe R, Stewart-Ibarra AM, Petrova D, Garcia-Diez M, Borbor-Cordova MJ,  
766 Mejia R, et al. Climate services for health: predicting the evolution of the 2016  
767 dengue season in Machala, Ecuador. *Lancet Planet Health*. 2017;1(4):e142-e51.
- 768 33. Ramadona AL, Lazuardi L, Hii YL, Holmner A, Kusnanto H, Rocklöv J.  
769 Prediction of Dengue Outbreaks Based on Disease Surveillance and Meteorological  
770 Data. *PLoS One*. 2016;11(3):e0152688.



- 771 34. Lauer SA, Sakrejda K, Ray EL, Keegan LT, Bi Q, Suangtho P, et al.  
772 Prospective forecasts of annual dengue hemorrhagic fever incidence in Thailand,  
773 2010-2014. *Proc Natl Acad Sci U S A*. 2018;115(10):E2175-E82.
- 774 35. Baquero OS, Santana LMR, Chiaravalloti-Neto F. Dengue forecasting in Sao  
775 Paulo city with generalized additive models, artificial neural networks and seasonal  
776 autoregressive integrated moving average models. *PLoS One*. 2018;13(4):e0195065.
- 777 36. Sirisena P, Noordeen F, Kurukulasuriya H, Romesh TA, Fernando L. Effect of  
778 Climatic Factors and Population Density on the Distribution of Dengue in Sri Lanka:  
779 A GIS Based Evaluation for Prediction of Outbreaks. *PLoS One*.  
780 2017;12(1):e0166806.
- 781 37. Anggraeni W, Aristiani L, editors. Using Google Trend data in forecasting  
782 number of dengue fever cases with ARIMAX method case study: Surabaya,  
783 Indonesia. 2016 International Conference on Information & Communication  
784 Technology and Systems (ICTS); 2016 12-12 Oct. 2016.
- 785 38. Marques-Toledo CA, Degener CM, Vinhal L, Coelho G, Meira W, Codeco  
786 CT, et al. Dengue prediction by the web: Tweets are a useful tool for estimating and  
787 forecasting Dengue at country and city level. *PLoS Negl Trop Dis*.  
788 2017;11(7):e0005729.
- 789 39. Cheong YL, Leitão PJ, Lakes T. Assessment of land use factors associated  
790 with dengue cases in Malaysia using Boosted Regression Trees. *Spatial and Spatio-  
791 temporal Epidemiology*. 2014;10:75-84.
- 792 40. Wesolowski A, Qureshi T, Boni MF, Sundsoy PR, Johansson MA, Rasheed  
793 SB, et al. Impact of human mobility on the emergence of dengue epidemics in  
794 Pakistan. *Proc Natl Acad Sci U S A*. 2015;112(38):11887-92.
- 795 41. Zhu G, Liu J, Tan Q, Shi B. Inferring the Spatio-temporal Patterns of Dengue  
796 Transmission from Surveillance Data in Guangzhou, China. *PLoS Negl Trop Dis*.  
797 2016;10(4):e0004633.
- 798 42. Zhu G, Xiao J, Zhang B, Liu T, Lin H, Li X, et al. The spatiotemporal  
799 transmission of dengue and its driving mechanism: A case study on the 2014 dengue  
800 outbreak in Guangdong, China. *Sci Total Environ*. 2018;622-623:252-9.
- 801 43. Liu K, Zhu Y, Xia Y, Zhang Y, Huang X, Huang J, et al. Dynamic  
802 spatiotemporal analysis of indigenous dengue fever at street-level in Guangzhou city,  
803 China. *PLOS Neglected Tropical Diseases*. 2018;12(3):e0006318.
- 804 44. Li Q, Cao W, Ren H, Ji Z, Jiang H. Spatiotemporal responses of dengue fever  
805 transmission to the road network in an urban area. *Acta Trop*. 2018;183:8-13.
- 806 45. Chen Y, Ong JHY, Rajarethinam J, Yap G, Ng LC, Cook AR.  
807 Neighbourhood level real-time forecasting of dengue cases in tropical urban  
808 Singapore. *BMC Medicine*. 2018;16(1):129.
- 809 46. Gardner L, Sarkar S. A global airport-based risk model for the spread of  
810 dengue infection via the air transport network. *PLoS One*. 2013;8(8):e72129.
- 811 47. Lauren M. Gardner DF, S. Travis Waller, Ophelia Wang and Sahotra Sarkar.  
812 A Predictive Spatial Model to Quantify the Risk of Air-Travel-Associated Dengue  
813 Importation into the United States and Europe. *Journal of Tropical Medicine*.  
814 2012;2012.
- 815 48. Grubaugh ND, Ladner JT, Kraemer MUG, Dudas G, Tan AL, Gangavarapu K,  
816 et al. Genomic epidemiology reveals multiple introductions of Zika virus into the  
817 United States. *Nature*. 2017;546:401.
- 818 49. Wilder-Smith A, Gubler DJ. Geographic expansion of dengue: the impact of  
819 international travel. *Med Clin North Am*. 2008;92(6):1377-90, x.

- 820 50. Faria NR, Azevedo R, Kraemer MUG, Souza R, Cunha MS, Hill SC, et al.  
821 Zika virus in the Americas: Early epidemiological and genetic findings. *Science*.  
822 2016;352(6283):345-9.
- 823 51. Gardner LM, Bota A, Gangavarapu K, Kraemer MUG, Grubaugh ND.  
824 Inferring the risk factors behind the geographical spread and transmission of Zika in  
825 the Americas. *PLoS Negl Trop Dis*. 2018;12(1):e0006194.
- 826 52. Tatem AJ, Hay SI. Climatic similarity and biological exchange in the  
827 worldwide airline transportation network. *Proceedings of the Royal Society B:*  
828 *Biological Sciences*. 2007;274(1617):1489.
- 829 53. Siriyasatien P, Phumee A, Ongruk P, Jampachaisri K, Kesorn K. Analysis of  
830 significant factors for dengue fever incidence prediction. *BMC Bioinformatics*.  
831 2016;17(1):166.
- 832 54. Nishanthi P h m Herath AaiPaHpW. Prediction of Dengue Outbreaks in Sri  
833 Lanka using Artificial Neural Networks. *International Journal of Computer*  
834 *Applications*. 2014;101(15):1-5.
- 835 55. Aburas HM, Cetiner BG, Sari M. Dengue confirmed-cases prediction: A  
836 neural network model. *Expert Systems with Applications*. 2010;37(6):4256-60.
- 837 56. Baquero OS, Santana LMR, Chiaravalloti-Neto F. Dengue forecasting in São  
838 Paulo city with generalized additive models, artificial neural networks and seasonal  
839 autoregressive integrated moving average models. *PLOS ONE*. 2018;13(4):e0195065.
- 840 57. Faisal T, Taib MN, Ibrahim F. Neural network diagnostic system for dengue  
841 patients risk classification. *Journal of medical systems*. 2012;36(2):661-76.
- 842 58. Laureano-Rosario EA, Duncan PA, Mendez-Lazaro AP, Garcia-Rejon EJ,  
843 Gomez-Carro S, Farfan-Ale J, et al. Application of Artificial Neural Networks for  
844 Dengue Fever Outbreak Predictions in the Northwest Coast of Yucatan, Mexico and  
845 San Juan, Puerto Rico. *Tropical Medicine and Infectious Disease*. 2018;3(1).
- 846 59. Kiskin I OB, Windebank T, Zilli D, Sinka M, Willis K, Roberts S. Mosquito  
847 detection with neural networks: the buzz of deep learning. *arXiv*. 2017.
- 848 60. Scavuzzo JM, Trucco FC, Tauro CB, German A, Espinosa M, Abril M,  
849 editors. Modeling the temporal pattern of Dengue, Chikungunya and Zika vector  
850 using satellite data and neural networks. 2017 XVII Workshop on Information  
851 Processing and Control (RPIC); 2017 20-22 Sept. 2017.
- 852 61. Sanchez-Ortiz A, Fierro-Radilla A, Arista-Jalife A, Cedillo-Hernandez M,  
853 Nakano-Miyatake M, Robles-Camarillo D, et al., editors. Mosquito larva  
854 classification method based on convolutional neural networks. 2017 International  
855 Conference on Electronics, Communications and Computers (CONIELECOMP);  
856 2017 22-24 Feb. 2017.
- 857 62. Nguyen T, Khosravi A, Creighton D, Nahavandi S, editors. Epidemiological  
858 dynamics modeling by fusion of soft computing techniques. The 2013 International  
859 Joint Conference on Neural Networks (IJCNN); 2013 4-9 Aug. 2013.
- 860 63. Jiang D, Hao M, Ding F, Fu J, Li M. Mapping the transmission risk of Zika  
861 virus using machine learning models. *Acta Tropica*. 2018;185:391-9.
- 862 64. Wahba G. *Spline Models for Observational Data*: Society for Industrial and  
863 *Applied Mathematics*; 1990. 177 p.
- 864 65. PAHO. Countries and territories with autochthonous transmission in the  
865 Americas reported in 2015-2017: Washington DC: World Health Organization, Pan  
866 American Health Organization; 2017 [Available from:  
867 [http://www.paho.org/hq/index.php?option=com\\_content&view=article&id=11603&Itemid=41696&lang=en](http://www.paho.org/hq/index.php?option=com_content&view=article&id=11603&Itemid=41696&lang=en).  
868



- 869 66. Gardner L, Chen N, Sarkar S. Vector status of *Aedes* species determines  
870 geographical risk of autochthonous Zika virus establishment. *PLoS Negl Trop Dis*.  
871 2017;11(3):e0005487.
- 872 67. Gardner LM, Chen N, Sarkar S. Global risk of Zika virus depends critically on  
873 vector status of *Aedes albopictus*. *The Lancet Infectious diseases*. 2016;16(5):522-3.
- 874 68. Kraemer MU, Sinka ME, Duda KA, Mylne AQ, Shearer FM, Barker CM, et  
875 al. The global distribution of the arbovirus vectors *Aedes aegypti* and *Ae. albopictus*.  
876 *Elife*. 2015;4:e08347.
- 877 69. Theze J, Li T, du Plessis L, Bouquet J, Kraemer MUG, Somasekar S, et al.  
878 Genomic Epidemiology Reconstructs the Introduction and Spread of Zika Virus in  
879 Central America and Mexico. *Cell host & microbe*. 2018;23(6):855-64.e7.
- 880 70. WorldBank. International Comparison Program database. GDP per capita,  
881 PPP 2016 [Available from:  
882 <https://data.worldbank.org/indicator/NY.GDP.PCAP.PP.CD>.
- 883 71. Analysis USBoE. Widespread Economic Growth Across States In 2011 2011 [  
884 72. Services USDoHaH. Health, United States, 2015 2015 [Available from:  
885 <https://www.cdc.gov/nchs/data/hus/hus15.pdf>.
- 886 73. (WHO) WHO. WHO World Health Statistics 2015 2015 [Available from:  
887 [http://www.who.int/gho/publications/world\\_health\\_statistics/2015/en/](http://www.who.int/gho/publications/world_health_statistics/2015/en/).
- 888 74. PAHO. PLISA Health Indication Platform for the Americas: Washington DC:  
889 World Health Organization, Pan American Health Organization; 2017 [Available  
890 from: <http://www.paho.org/data/index.php/en/>.
- 891 75. Bank W. International Comparison Program database. Population density  
892 (people per sq. km of land area) 2016 [Available from:  
893 <http://data.worldbank.org/indicator/EN.POP.DNST>.
- 894 76. International Air Travel Association (IATA)- Passenger Intelligence Services  
895 (PaxIS) [Available from:  
896 <http://www.iata.org/services/statistics/intelligence/paxis/Pages/index.aspx>.
- 897 77. Pigott D, Deshpande A, Letourneau I, Morozoff C, Reiner Jr R, Kraemer M, et  
898 al. Local, national, and regional viral haemorrhagic fever pandemic potential in  
899 Africa: a multistage analysis. *Lancet*. 2017;390(10113):2662-72.
- 900 78. Leontaritis IJ, Billings SA. Input-output parametric models for non-linear  
901 systems Part I: deterministic non-linear systems. *International Journal of Control*.  
902 1985;41(2):303-28.
- 903 79. Narendra KS, Parthasarathy K. Identification and control of dynamical  
904 systems using neural networks. *IEEE Transactions on Neural Networks*. 1990;1(1):4-  
905 27.
- 906 80. Chen S, Billings SA, Grant PM. Non-linear system identification using neural  
907 networks. *International Journal of Control*. 1990;51(6):1191-214.
- 908 81. Siegelmann HT, Horne BG, Giles CL. Computational capabilities of recurrent  
909 NARX neural networks. *IEEE Trans Syst Man Cybern B Cybern*. 1997;27(2):208-15.
- 910 82. Tsungnan L, Bill GH, Peter T, Giles CL. Learning long-term dependencies is  
911 not as difficult with NARX recurrent neural networks. University of Maryland at  
912 College Park; 1995. p. 23.
- 913 83. MATLAB and Neural Network Toolbox Release 2018a Natick,  
914 Massachusetts, United States: MathWorks; [Available from:  
915 [https://au.mathworks.com/help/pdf\\_doc/nnet/nnet\\_ug.pdf](https://au.mathworks.com/help/pdf_doc/nnet/nnet_ug.pdf).
- 916 84. Fawcett T. ROC graphs: Notes and practical considerations for researchers.  
917 *Machine Learning*. 2004;31:1-38.

- 918 85. Faria NR, Quick J, Claro IM, Thézé J, de Jesus JG, Giovanetti M, et al.  
919 Establishment and cryptic transmission of Zika virus in Brazil and the Americas.  
920 Nature. 2017;546:406.
- 921 86. Gardner L, Chen N, Sarkar S. Global risk of Zika virus depends critically on  
922 vector status of *Aedes albopictus*. Lancet Infectious Diseases. 2016;16(5):522-3.
- 923 87. Brockmann D, Helbing D. The Hidden Geometry of Complex, Network-  
924 Driven Contagion Phenomena. Science. 2013;342:1337-42.
- 925 88. Boussaada Z, Curea O, Remaci A, Camblong H, Mrabet Bellaaj N. A  
926 Nonlinear Autoregressive Exogenous (NARX) Neural Network Model for the  
927 Prediction of the Daily Direct Solar Radiation. Energies. 2018;11(3).  
928  
929

930

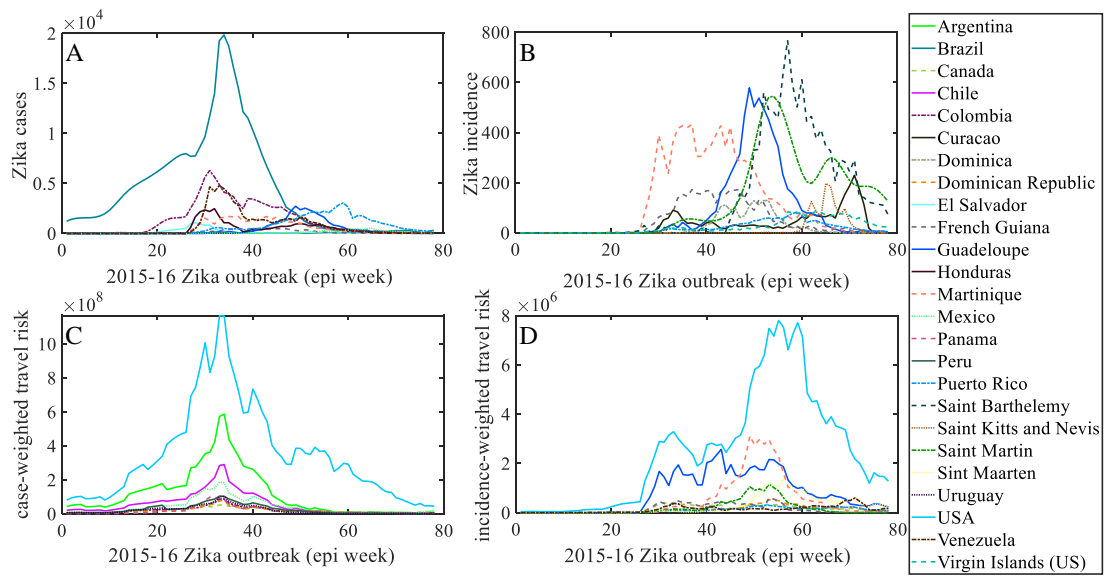

931

932

933 **Fig 1. Weekly distribution of case and connectivity-risk variables.** (A) Zika cases

934 (B) incidence rates in the Americas, (C) case-weighted travel risk  $CR_j^t$ , and (D)

935 incidence weighted travel risk  $IR_j^t$ , for top 10 ranked countries and territories in the

936 Americas for each respective variable.

937

938

939

940

941

942

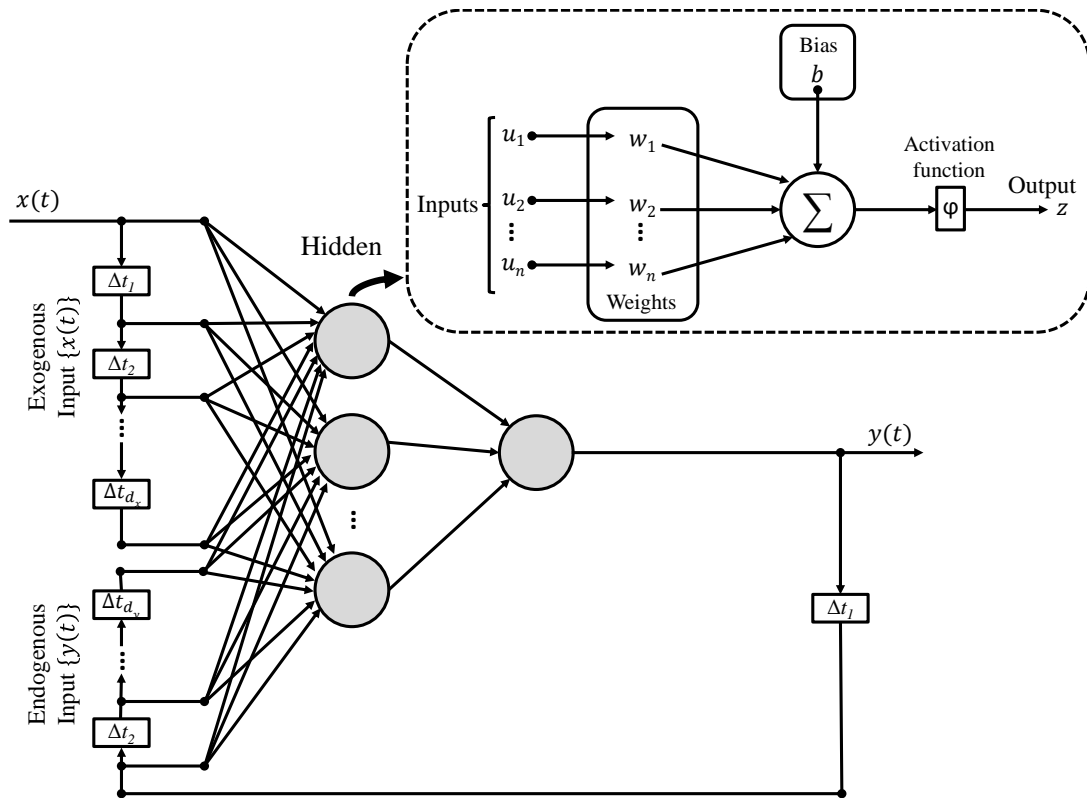

943

944 **Fig 2. Schematic of NARX network with  $\mathbf{d}_x$  input and  $\mathbf{d}_y$  output delays:** Each  
 945 neuron produces a single output based on several real-valued inputs to that neuron by  
 946 forming a linear combination using its input weights and sometimes passing the  
 947 output through a nonlinear activation function:  $\mathbf{z} = \boldsymbol{\phi}(\sum_{i=1}^n \mathbf{w}_i \mathbf{u}_i + \mathbf{b}) = \boldsymbol{\phi}(\mathbf{w}^T \mathbf{x} +$   
 948  $\mathbf{b})$ , where  $\mathbf{w}$  denotes the vector of weights,  $\mathbf{u}$  is the vector of inputs,  $\mathbf{b}$  is the bias and  
 949  $\boldsymbol{\phi}$  is a linear or nonlinear activation function (e.g., Linear, Sigmoid, and Hyperbolic  
 950 tangent (88)).

951

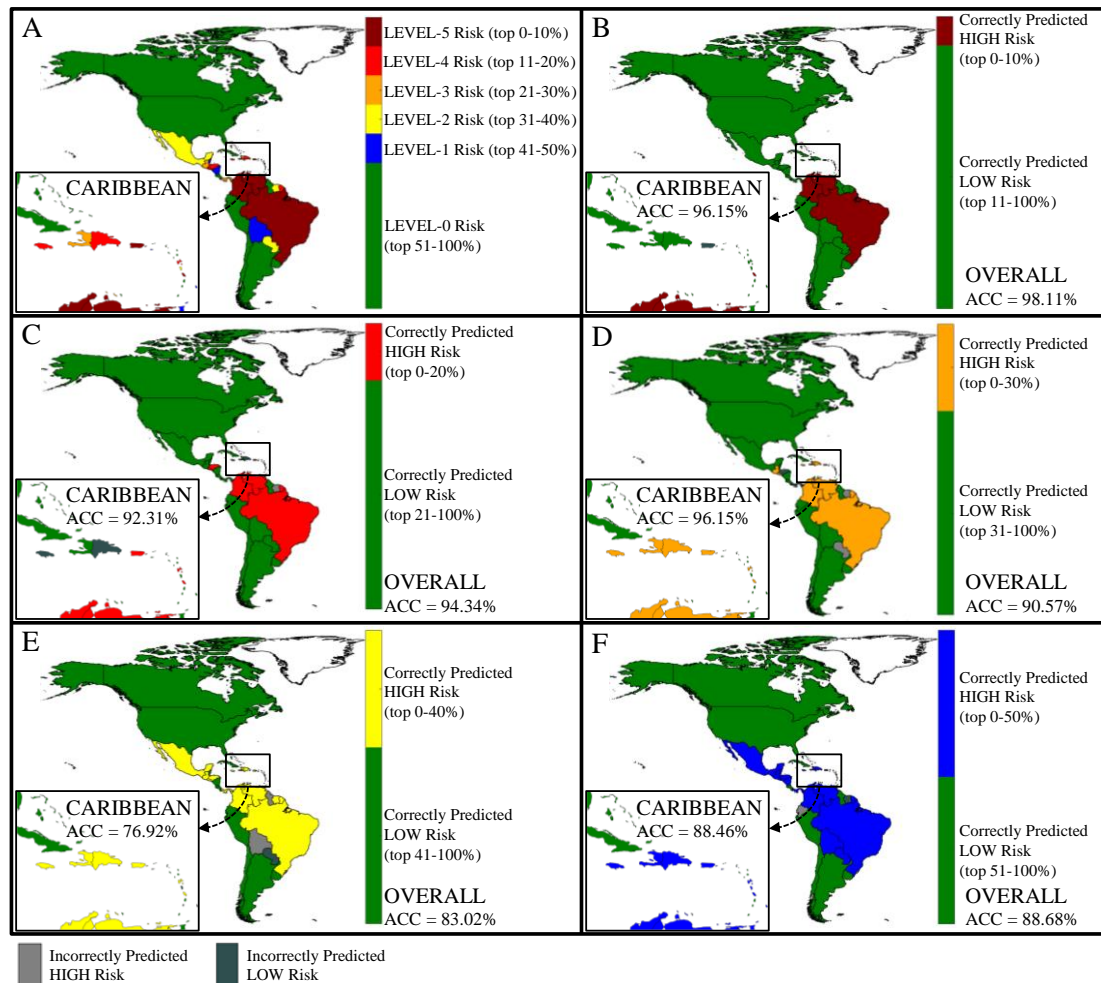

952  
953  
954  
955  
956  
957  
958  
959  
960  
961  
962

**Fig 3. Country prediction accuracy by relative risk level.** Panel (A) illustrates the actual relative risk level assigned to each country at Epi week 40 for a fixed forecast window,  $N=4$ . Panels (B)-(E) each corresponds to a different classification scheme, specifically (B)  $R=0.1$ , (C)  $R=0.2$ , (D)  $R=0.3$ , (E)  $R=0.4$ , and (F)  $R=0.5$ . The inset shown by the small rectangle highlights the actual and predicted risk in Caribbean islands. For Panels (B)-(E), green indicates a correctly predicted low risk country, light grey indicates an incorrectly predicted high risk country, and dark grey indicates an incorrectly predicted low risk country. The risk indicator used is case counts.

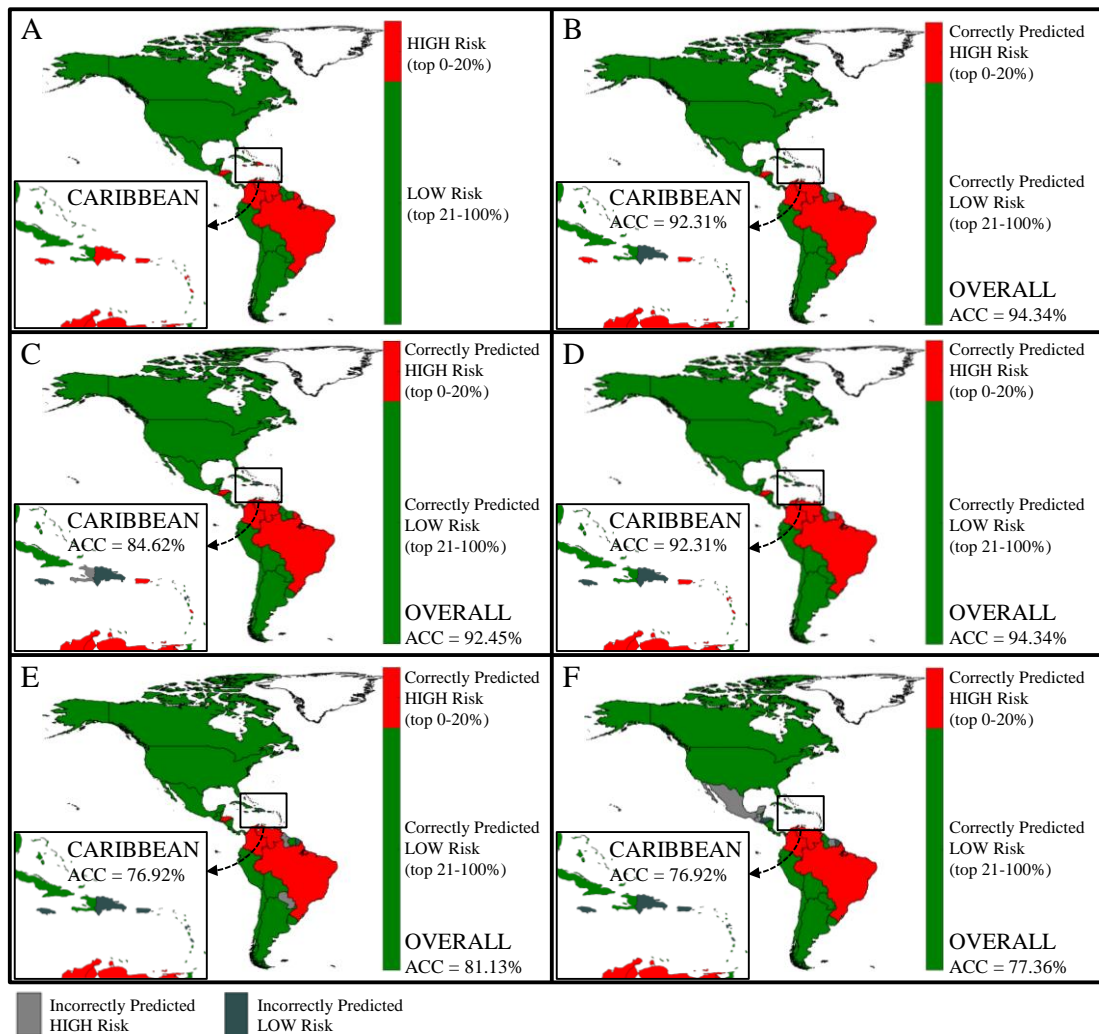

963  
964  
965  
966  
967  
968  
969  
970  
971  
972  
973  
974

**Fig 4. Country prediction accuracy by forecast window.** Panel (A) illustrates the actual relative risk level assigned to each country at Epi week 40 for a fixed classification scheme,  $R=0.2$ . Panels (B)-(E) each corresponds to different forecast windows, specifically (B)  $N=1$ , (C)  $N=2$ , (D)  $N=4$ , (E)  $N=8$ , and (F)  $N=12$ . The inset shown by the small rectangle highlights the actual and predicted risk in Caribbean islands. For Panels (B)-(E), the red indicates a correctly predicted high risk country and green indicates a correctly predicted low risk country. Light grey indicates an incorrectly predicted high risk country, and dark grey indicates an incorrectly predicted low risk country. The risk indicator used is case counts.

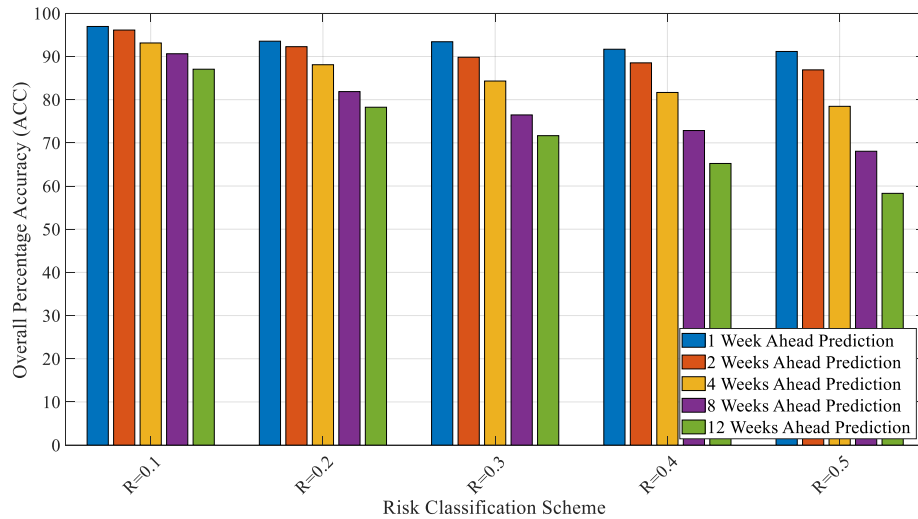

975  
976  
977  
978  
979  
980

**Fig 5. Aggregate model performance measured by ACC** (averaged over all locations and all weeks) for all combinations of relative risk classification schemes (i.e.,  $R = 0.1, 0.2, 0.3, 0.4$  and  $0.5$ ) and forecast windows (i.e.,  $N = 1, 2, 4, 8$  and  $12$ ), where the risk indicator is case counts.

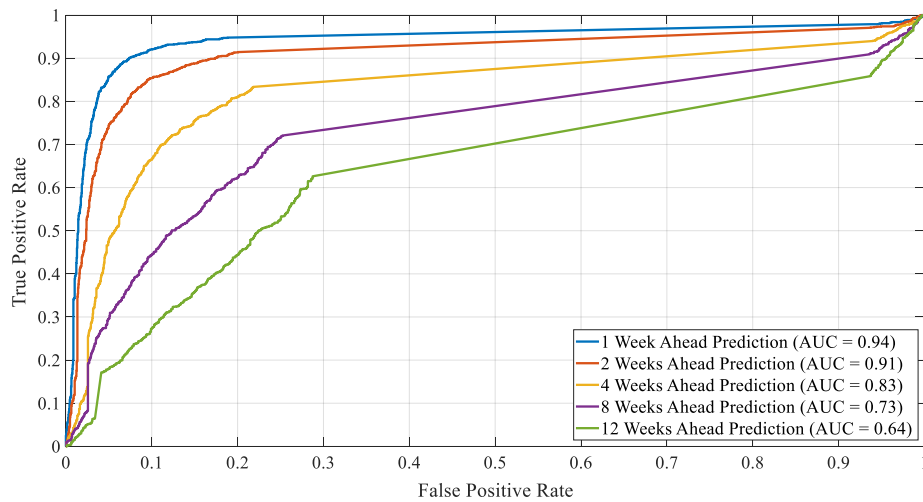

981  
982  
983  
984  
985  
986

**Fig 6. Aggregate model performance measured by ROC AUC** (averaged over all locations and all weeks) for a fixed relative risk classification scheme, i.e.,  $R = 0.4$ , and forecast windows (i.e.,  $N = 1, 2, 4, 8$  and  $12$ ), where the risk indicator is case counts.

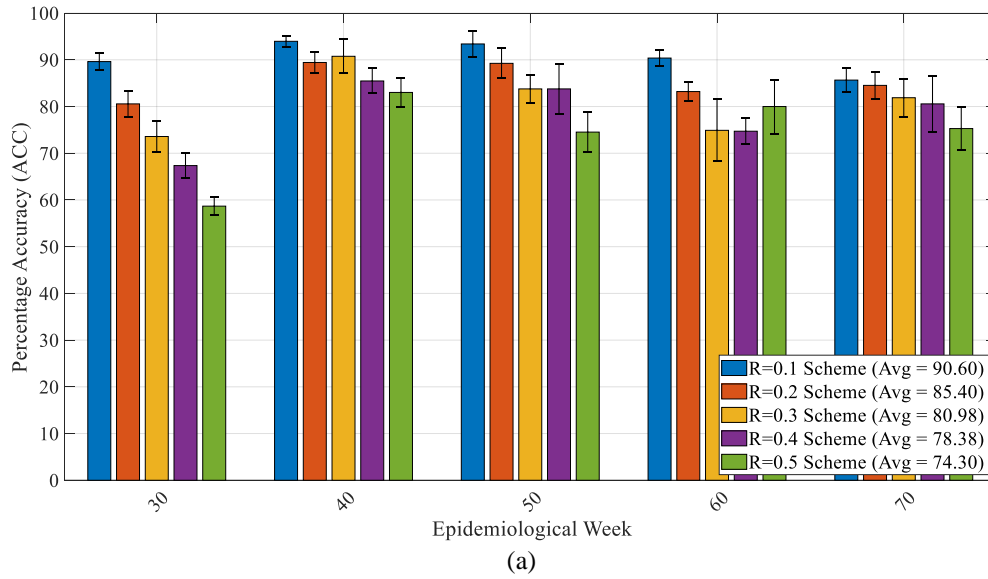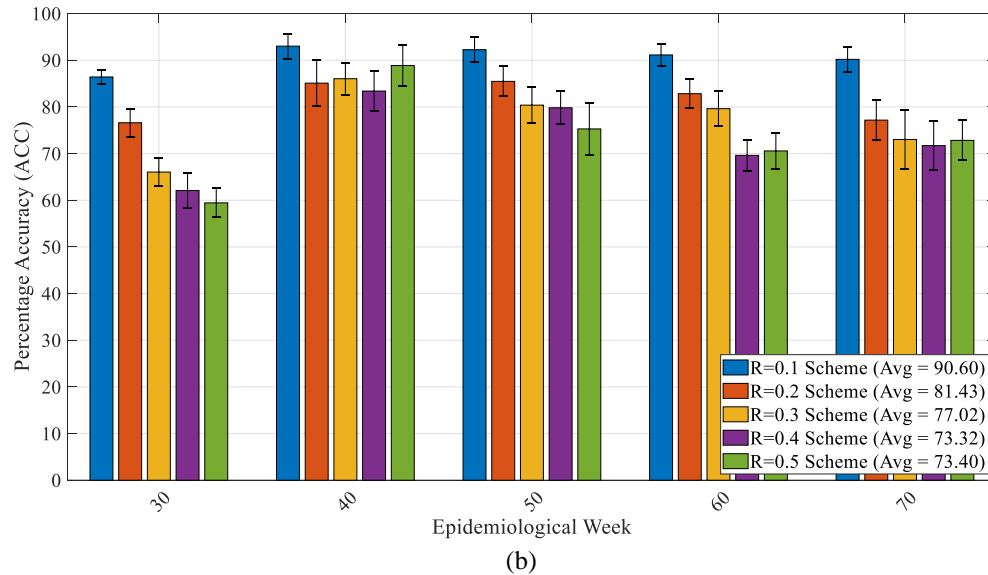

987

988

989

990

991

**Fig 7. Model performance and robustness.** ACC is averaged over all locations for selected epidemiological weeks when risk indicator is (a) case counts and (b) incidence rate, and a fixed forecast windows (i.e.,  $N = 4$ ). The error bars represent the variability in expected ACC across ten runs for each combination.
